# Supplementary material for: New dithienyl-diketopyrrolopyrrole-based conjugated molecules entailing electron withdrawing moieties for organic ambipolar semiconductors and photovoltaic materials
Source: Royal Society of Chemistry journal article supplement (doi:10.1039/c4tc01872a), 2014-10-10

## Supporting Information

### **New Dithienyl-Diketopyrrolopyrrole-based Conjugated Molecules entailing Electron Withdrawing Moieties for Organic Ambipolar Semiconductors and Photovoltaic Materials**

Chenmin Yu, Zitong Liu,\* Yang Yang, Jingjing Yao, Zhengxu Cai, Hwei Luo, Guanxin Zhang,  
Deqing Zhang\*

Beijing National Laboratory for Molecular Sciences, Organic Solids Laboratory,  
Institute of Chemistry, Chinese Academy of Sciences, Beijing 100190, China.

E-mail: dqzhang@iccas.ac.cn

|                                                                      |             |
|----------------------------------------------------------------------|-------------|
| <b>1. TGA and DSC Analysis.....</b>                                  | <b>2</b>    |
| <b>2. UV-vis Absorption Spectra of DPPBZ.....</b>                    | <b>2</b>    |
| <b>3. Output Curves of OFETs based on DPPBT and DPPTT.....</b>       | <b>2-3</b>  |
| <b>4. Transfer and Output Curves of OFET based on DPPBZ.....</b>     | <b>3</b>    |
| <b>5. XRD Patterns and AFM Height Images of OFETs.....</b>           | <b>3-4</b>  |
| <b>6. UV-vis Absorption Spectra of OPVs.....</b>                     | <b>5</b>    |
| <b>7. XRD Patterns of OPVs.....</b>                                  | <b>5</b>    |
| <b>8. <sup>1</sup>H-NMR, <sup>13</sup>C-NMR and TOF Spectra.....</b> | <b>6-11</b> |

## 1. TGA and DSC Analysis

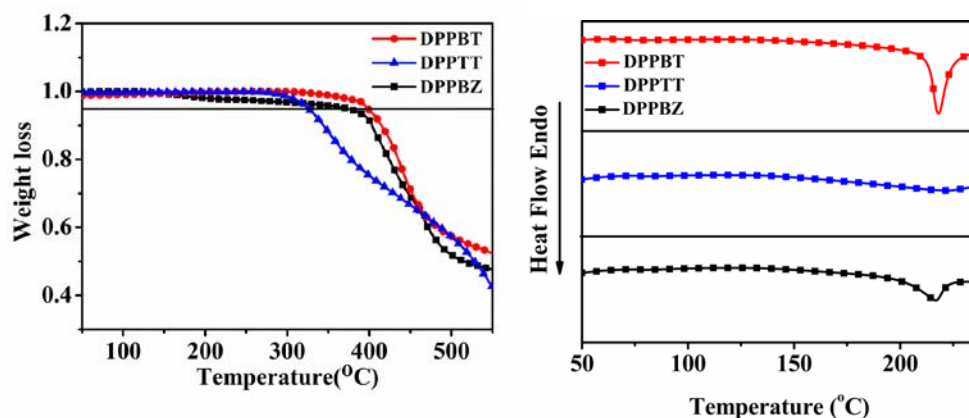

**Figure S1.** TGA (left) and DSC (right) curves of **DPPBT**, **DPPTT** and **DPPBZ** (heating rate: 10 °C/min. from 30 °C to 550 °C under nitrogen atmosphere).

## 2. UV-vis Absorption Spectra of DPPBZ

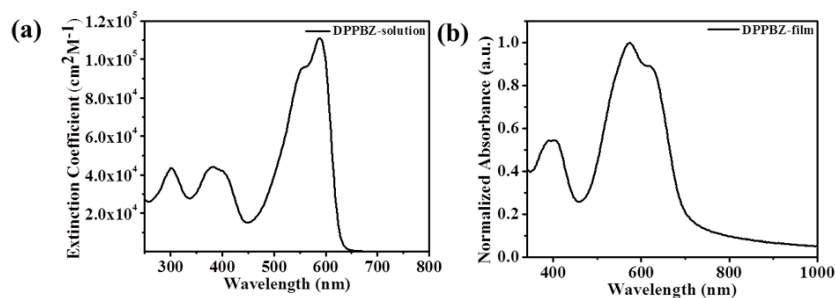

**Figure S2.** UV-vis absorption spectra of **DPPBZ** in  $\text{CHCl}_3$  ( $1.0 \times 10^{-5}$  M) solution (a) and its thin film (b).

## 3. Output Curves of OFETs based on DPPBT and DPPTT

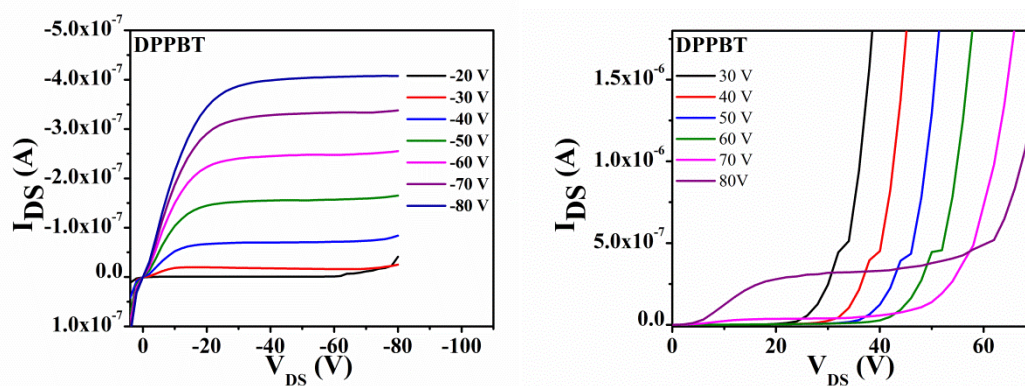

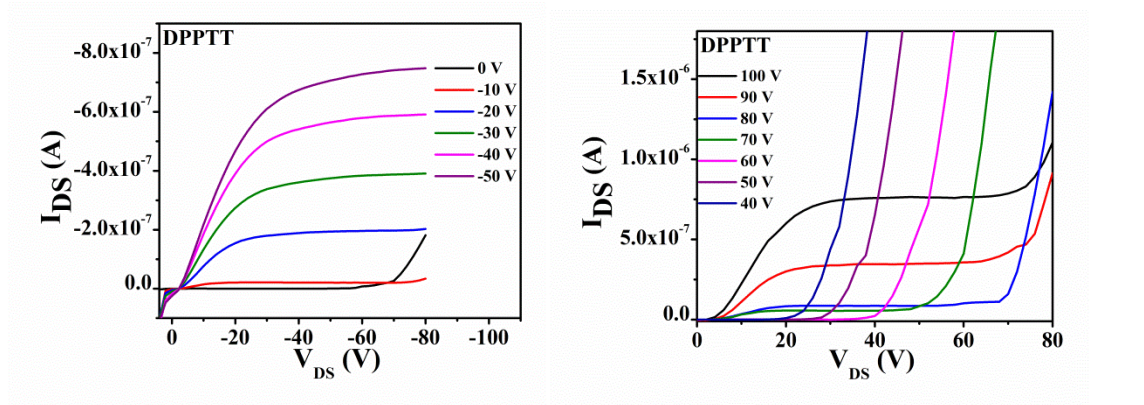

**Figure S3.** The output characteristics of OFETs based on **DPPBT** and **DPPTT** after thermal annealing at 100 °C.

#### 4. Transfer and Output Curves of OFET based on DPPBZ

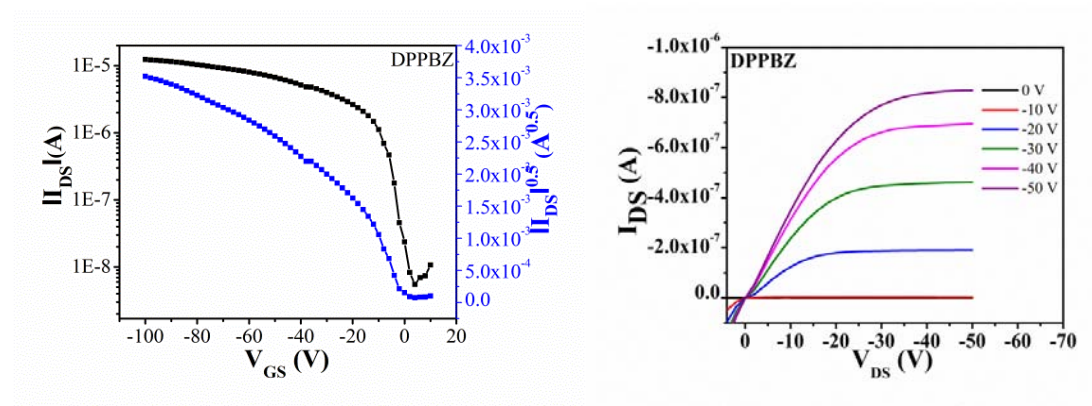

**Figure S4.** The transfer and output characteristics of OFET based on thin film of **DPPBZ** after thermal annealing at 100 °C.  $V_{DS}$  for transfer characteristic is -100 V, respectively.

#### 5. XRD Patterns and AFM Height Images of OFETs

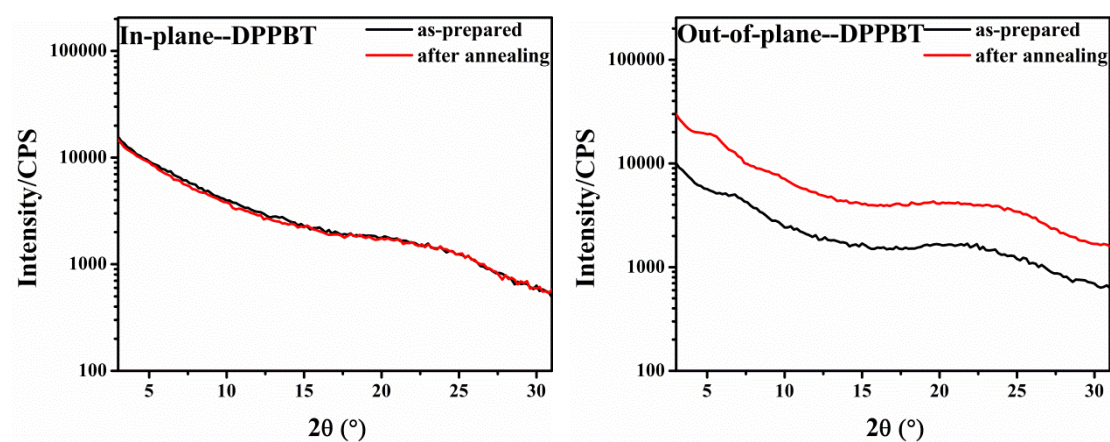

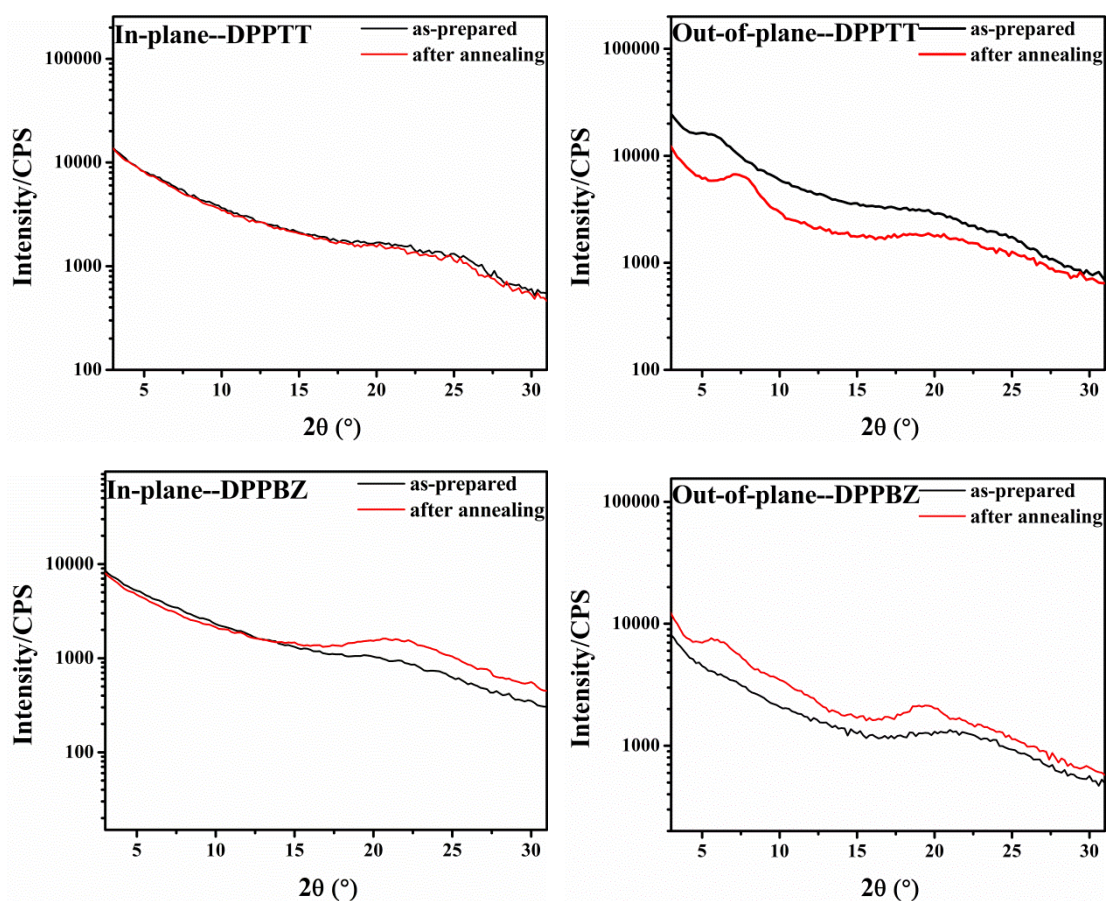

**Figure S5.** In-plane and out-of-plane XRD patterns of as-prepared thin films of DPPBT, DPPTT and DPPBZ and those after thermal annealing at 100 °C.

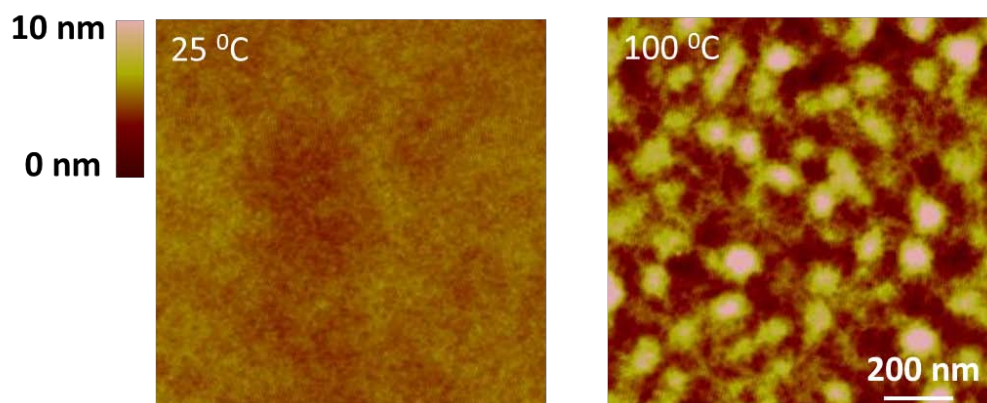

**Figure S6.** AFM height images ( $2.0 \mu\text{m} \times 2.0 \mu\text{m}$ ) of as-prepared thin film of DPPBZ and that after annealing at 100 °C.



## 6. UV-vis Absorption Spectra of OPVs

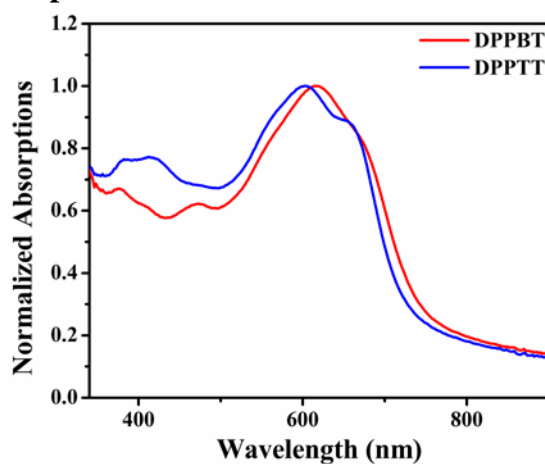

**Figure S7.** Normalized UV-vis absorption spectra of thin films of **DPPBT:PC<sub>71</sub>BM** (w/w, 1:1) and **DPPTT:PC<sub>71</sub>BM** (w/w, 1:1).

## 7. XRD patterns of OPVs

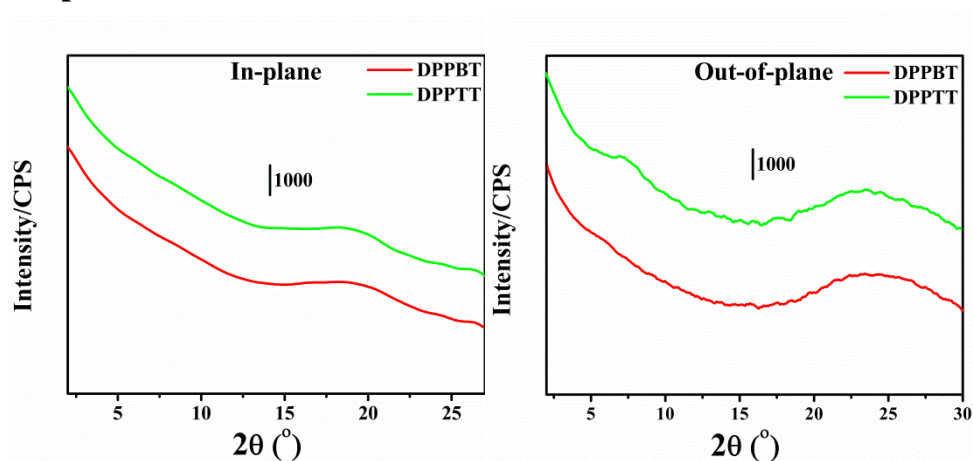

**Figure S8.** In-plane and out-of-plane XRD patterns of thin films of **DPPBT:PC<sub>71</sub>BM** (w/w, 1:1) and **DPPTT:PC<sub>71</sub>BM** (w/w, 1:1).

## 8. <sup>1</sup>H-NMR, <sup>13</sup>C-NMR and TOF Spectra

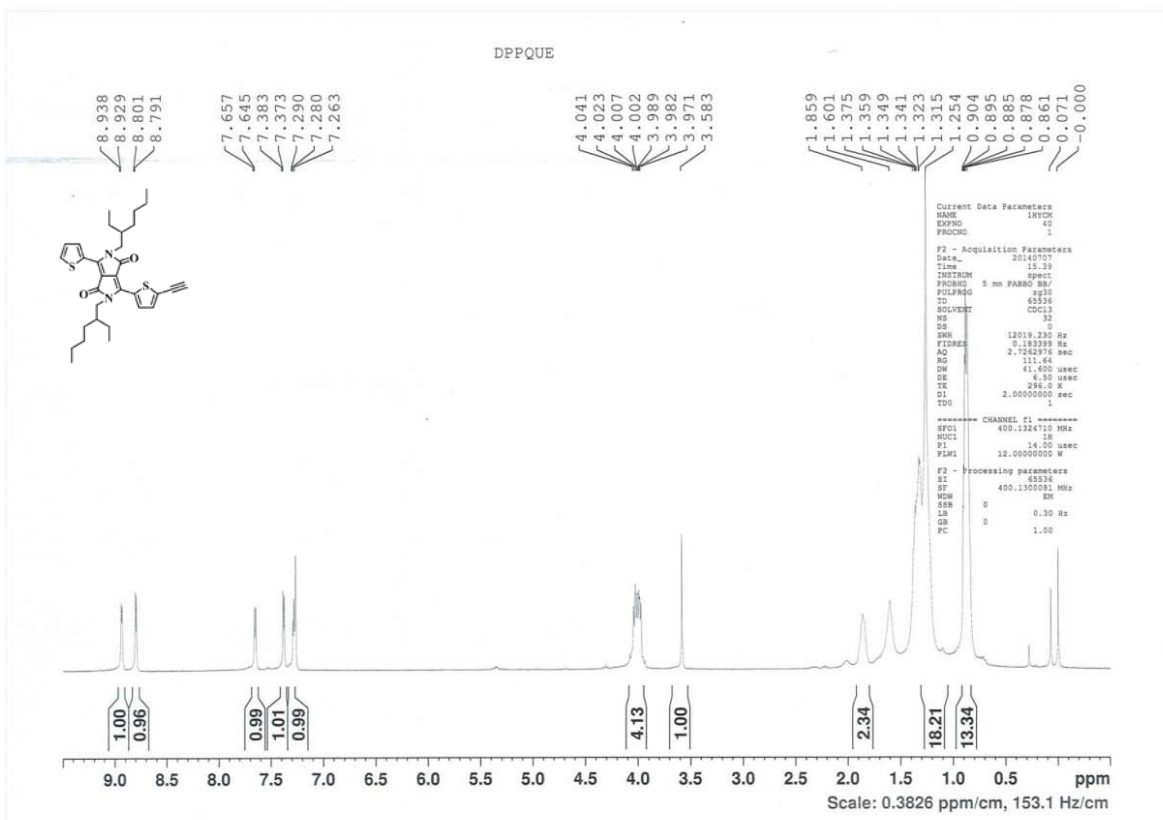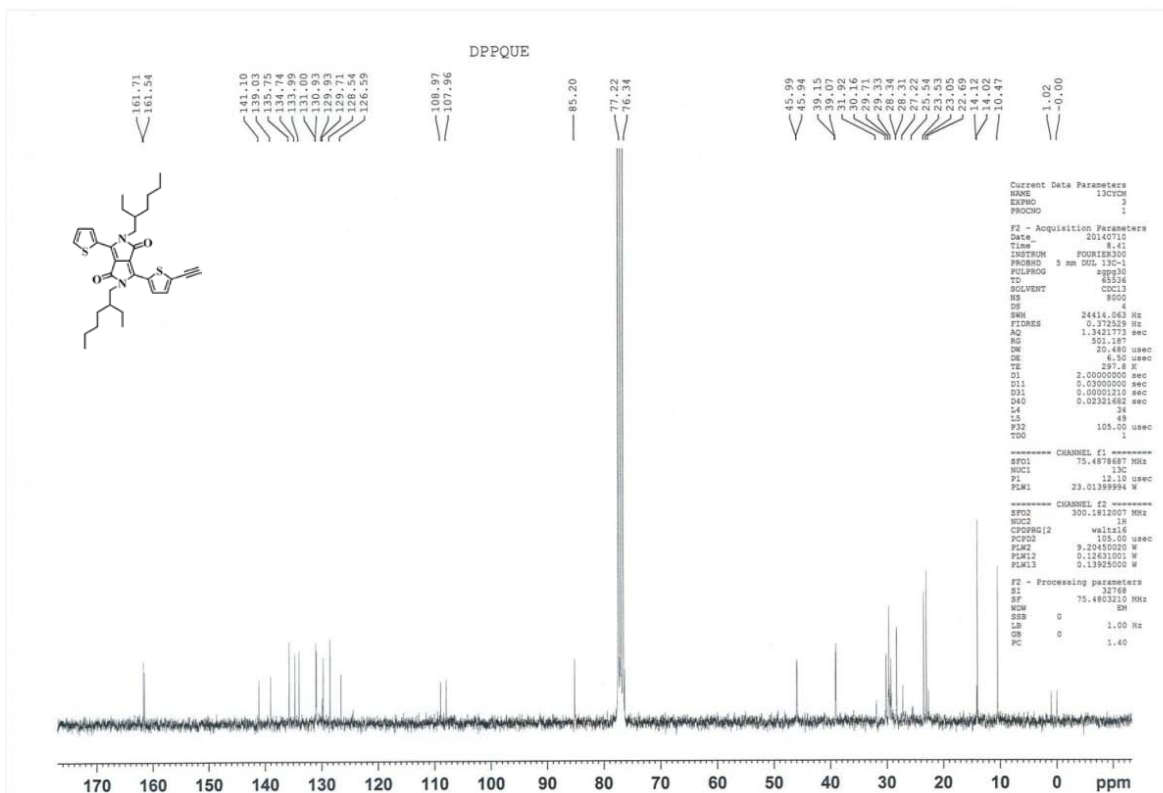

### MALDI-TOF,CCA,YU-2

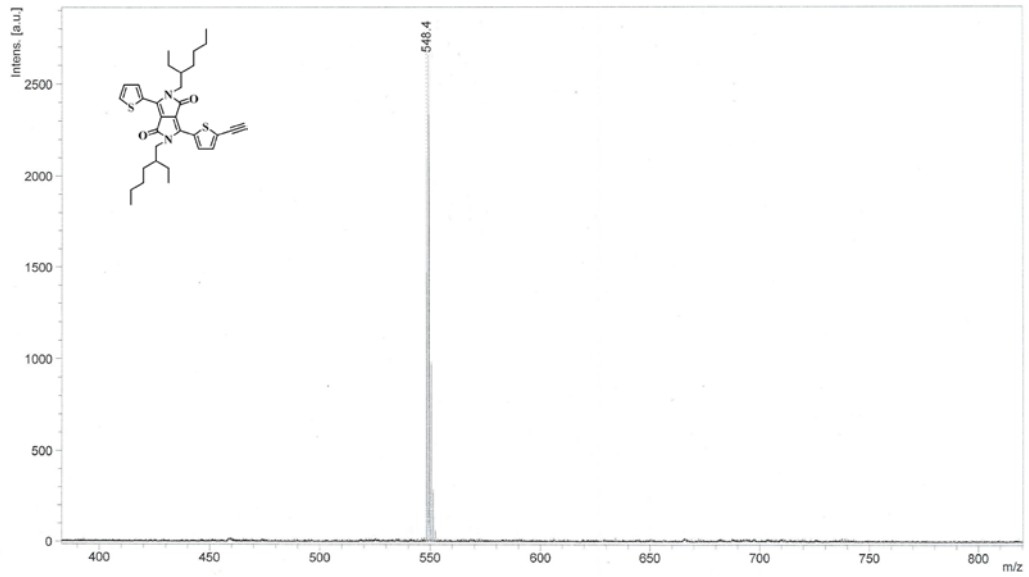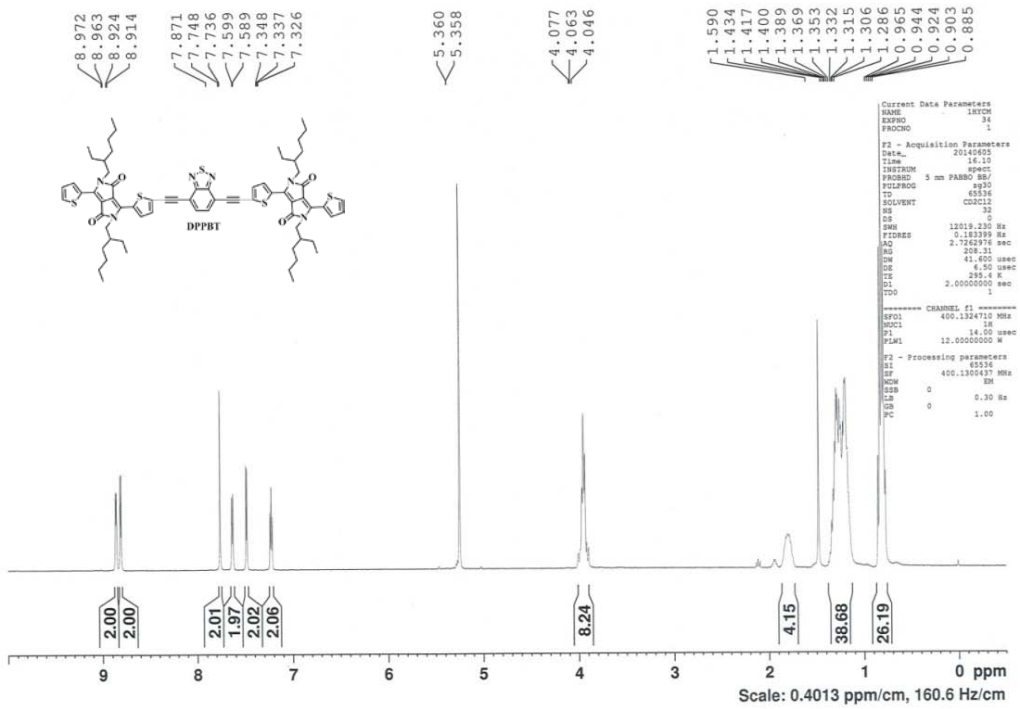

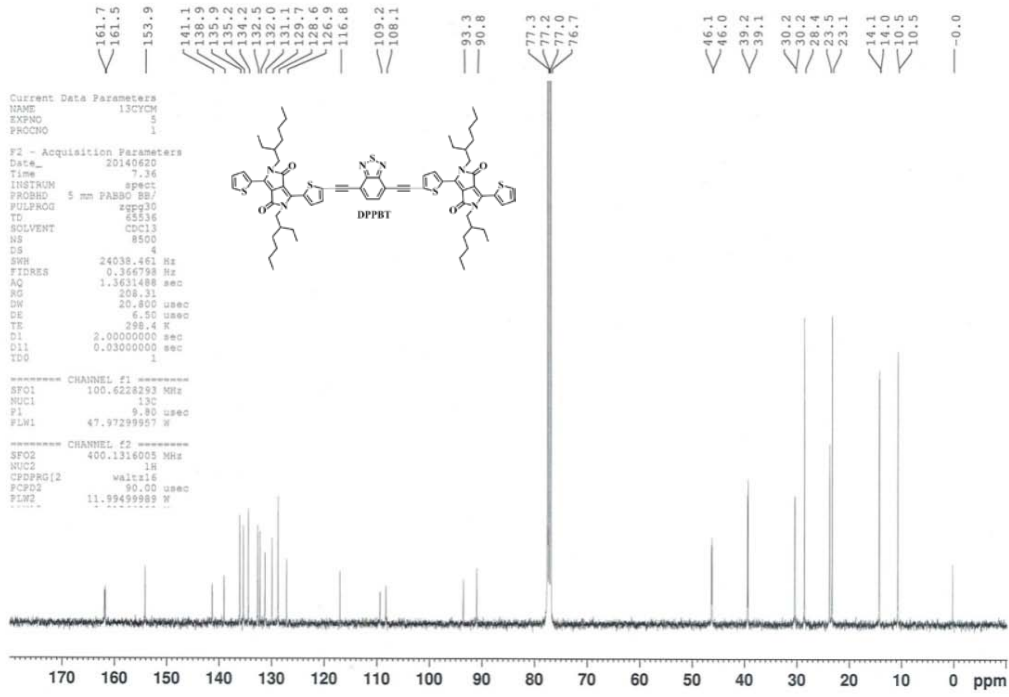

D:\DATA\2014\201409\20140918\201409181110\_C2211

printed: 9/18/2014 2:54:55 PM

### MALDI-TOF,CCA,BT

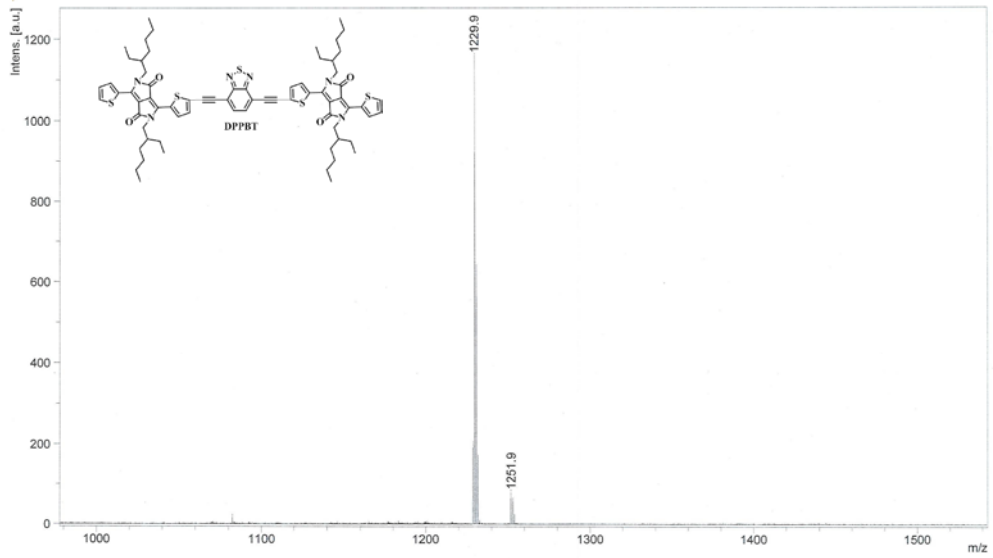



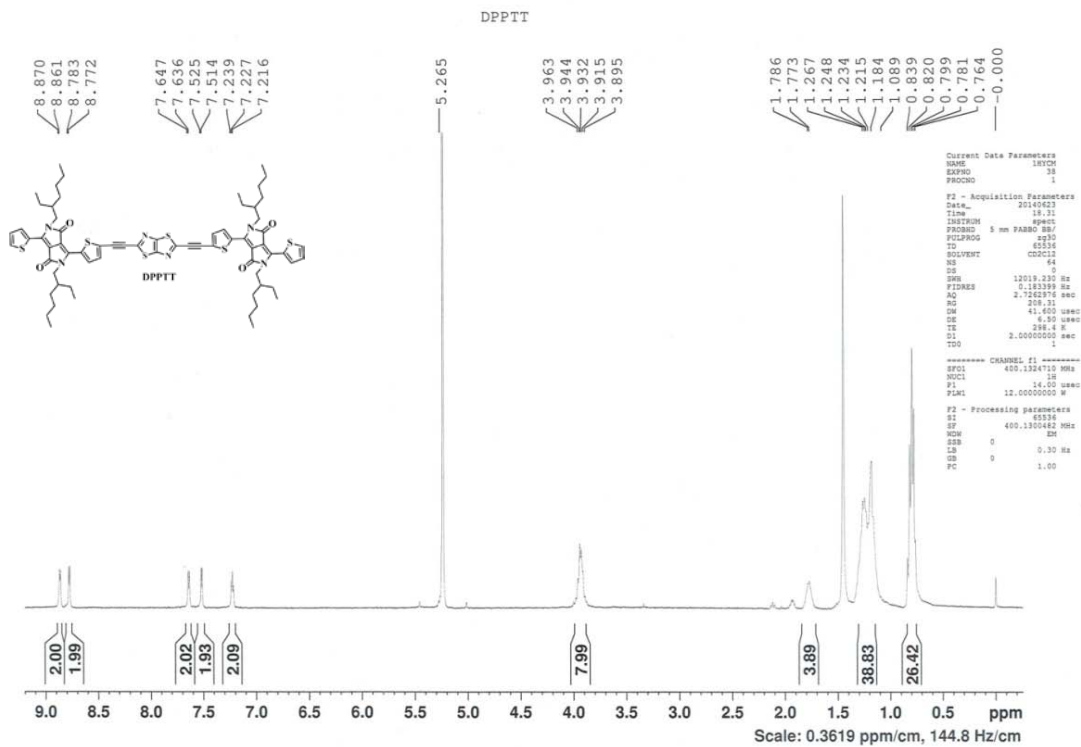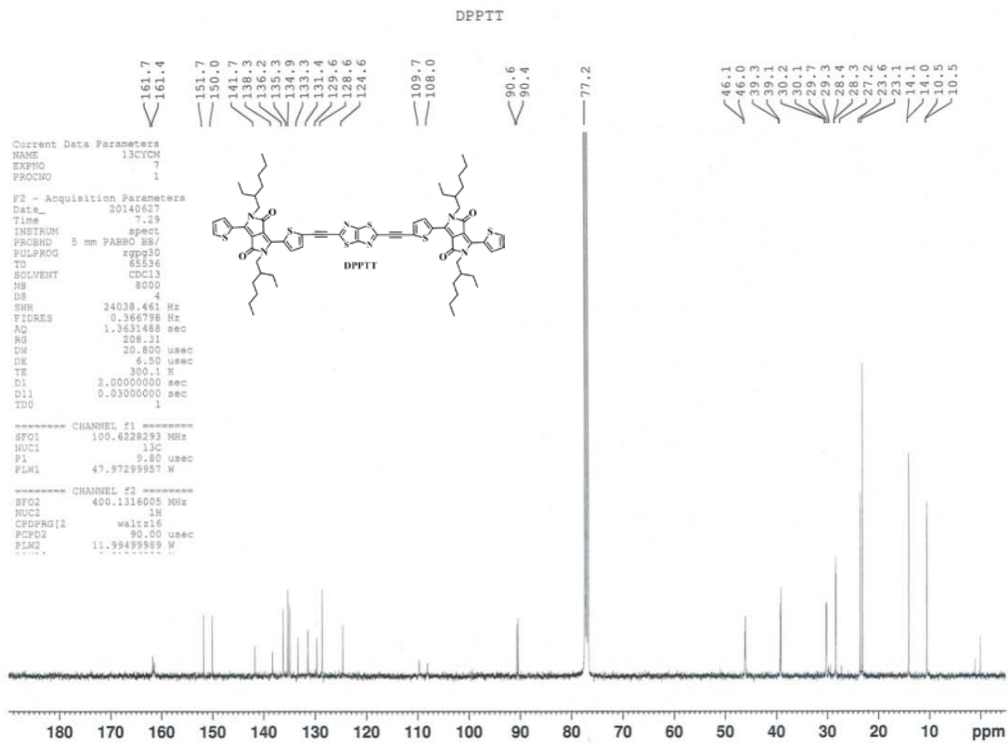

### MALDI-TOF, CCA, YU-1, 2012, 10, 23

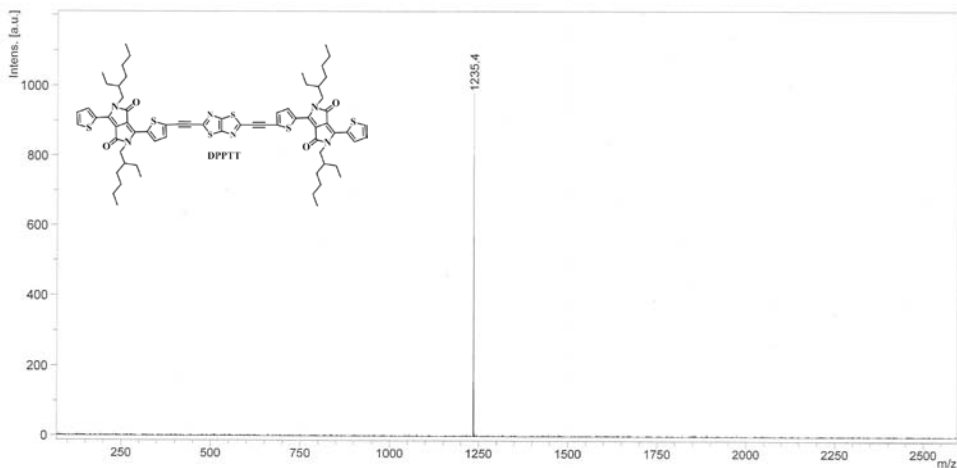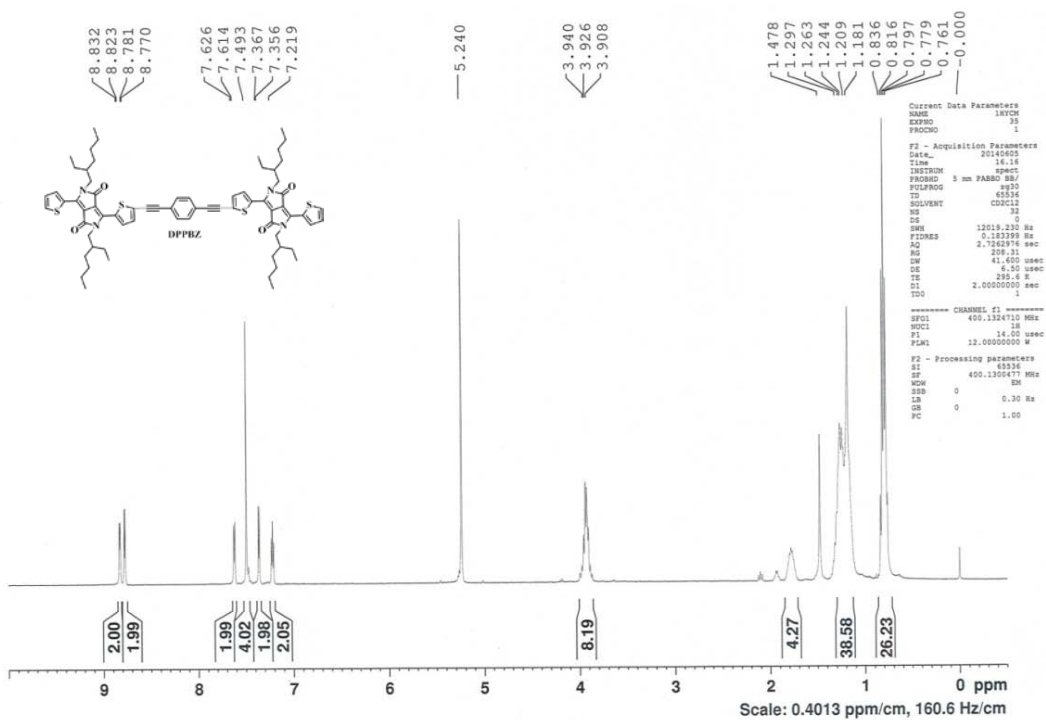

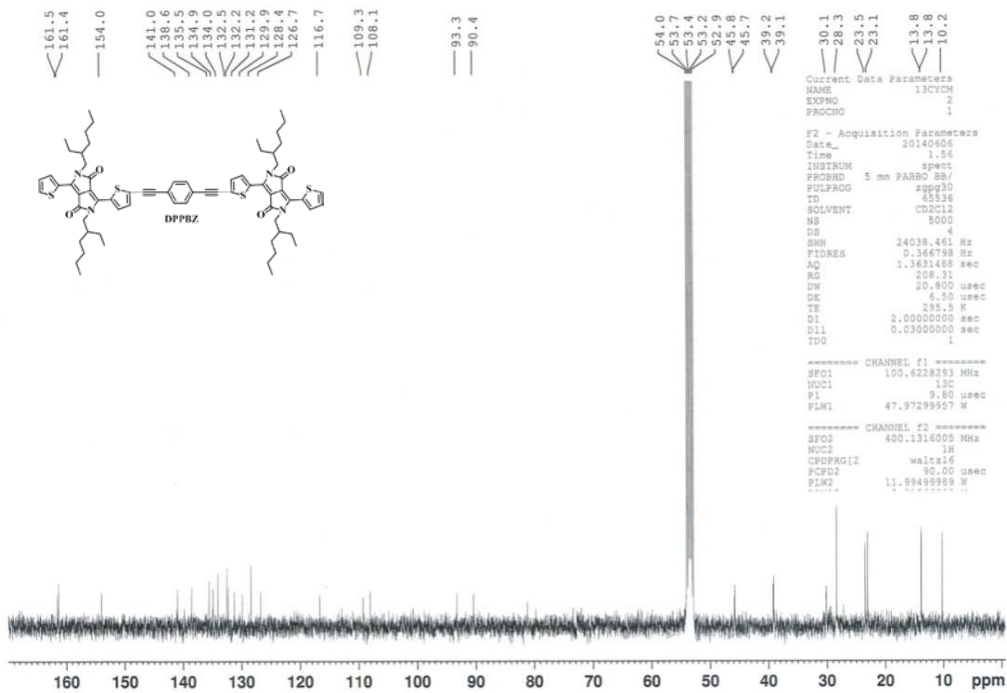

D:\Data\_CI\2012\2012-5\20120514\2012051416\0\_A18\1

printed: 5/14/2012 5:17:18 PM

### MALDI-TOF, CCA, YUCM-1, 2012, 05, 14

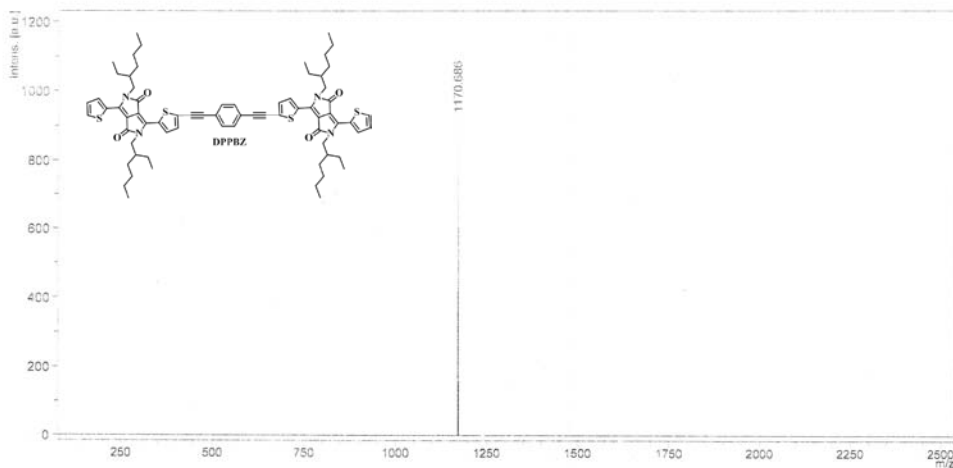

Supplement: c4tc01872a1.pdf [file c4tc01872a1.pdf]
